# Supplementary material for: GRHL2-controlled gene expression networks in luminal breast cancer
Source: PubMed Central journal article supplement (PMC9869538; doi:10.1186/s12964-022-01029-5), 2023-01-23

Fig. S2

MCF7

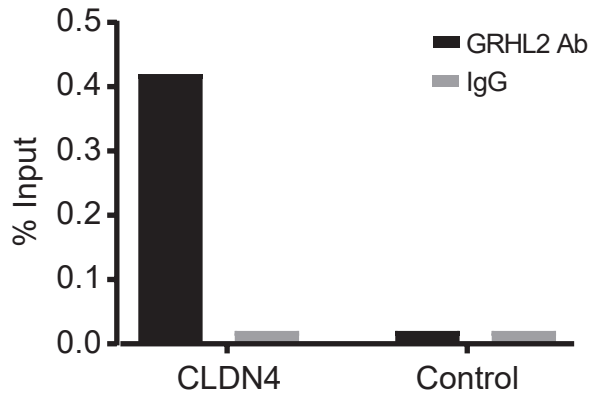

BT474

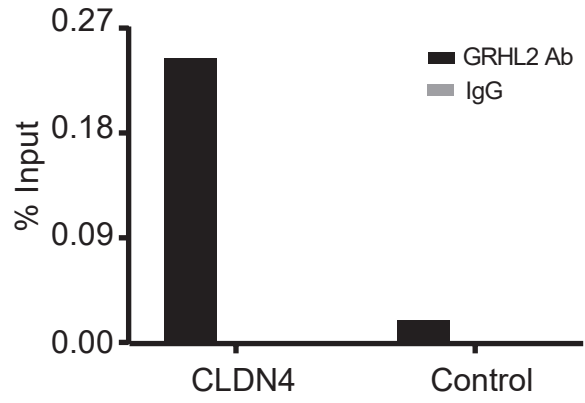

T47D

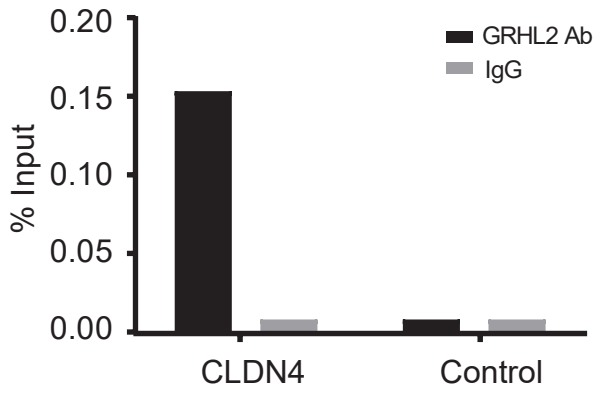

Hs578T

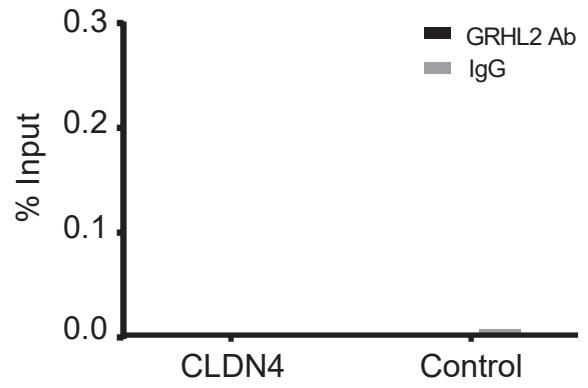

Supplement: 12964_2022_1029_MOESM3_ESM.pdf [file 12964_2022_1029_MOESM3_ESM.pdf]
