# Supplementary material for: GRHL2-controlled gene expression networks in luminal breast cancer
Source: PubMed Central journal article supplement (PMC9869538; doi:10.1186/s12964-022-01029-5), 2023-01-23

Fig. S4

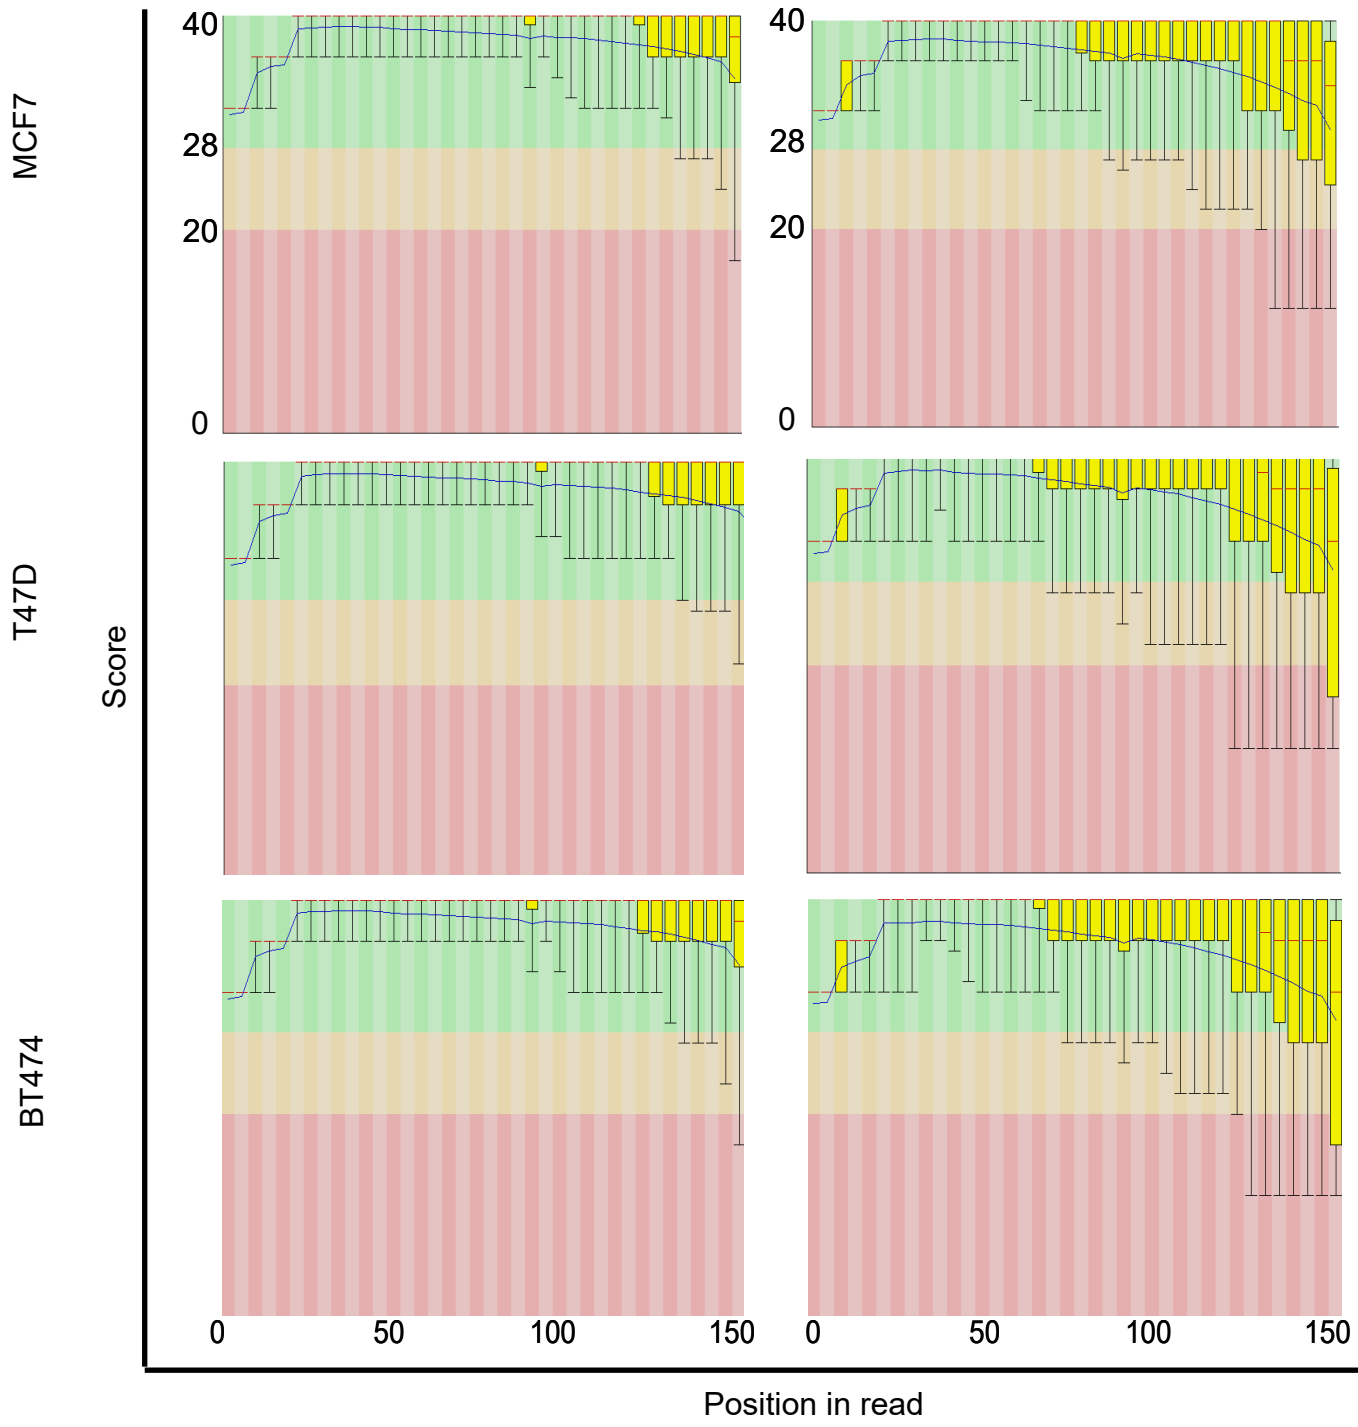

Supplement: 12964_2022_1029_MOESM5_ESM.pdf [file 12964_2022_1029_MOESM5_ESM.pdf]
