# Supplementary material for: GRHL2-controlled gene expression networks in luminal breast cancer
Source: PubMed Central journal article supplement (PMC9869538; doi:10.1186/s12964-022-01029-5), 2023-01-23
Supplement: 12964_2022_1029_MOESM8_ESM.pdf [file 12964_2022_1029_MOESM8_ESM.pdf]

MCF7 sgCTR

Dox (days) 0 2 4 8 16

GRHL2  
(71kDa)

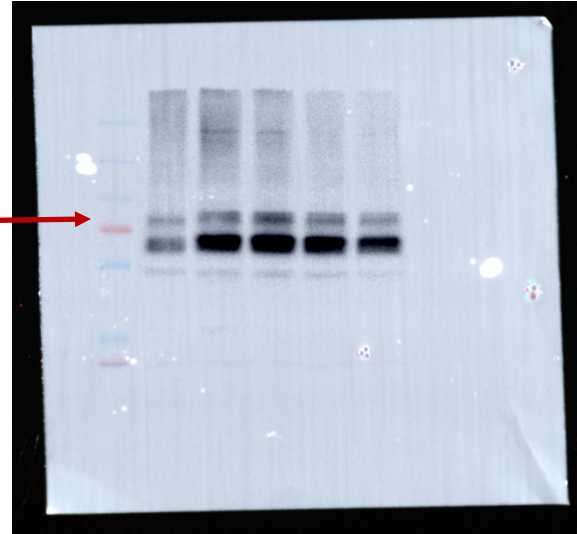

Cas9  
(150kDa)

GAPDH  
(35kDa)

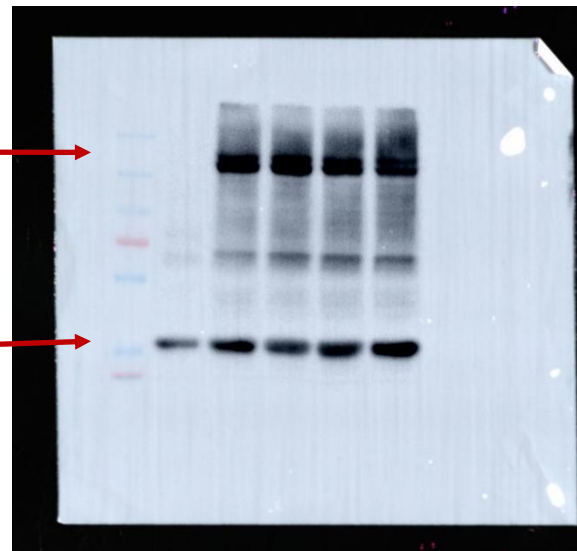

MCF7 sg GRHL2 (1)

Dox (days) 0 2 4 8 16

GRHL2  
(71kDa)

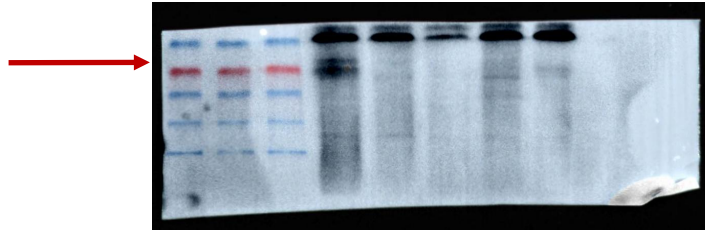

Cut here

GAPDH  
(35kDa)

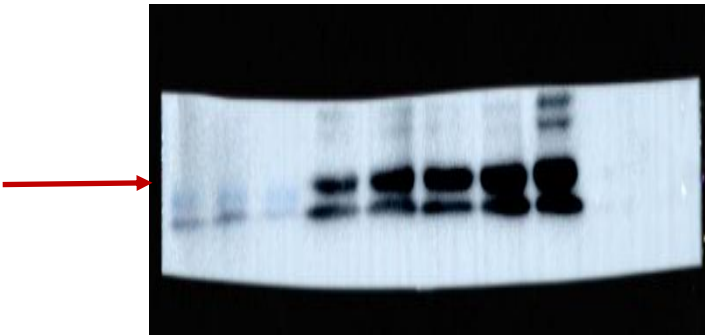

Cut here

MCF7 sg GRHL2 (2)

Dox (days) 0 2 4 8 16

GRHL2  
(71kDa)

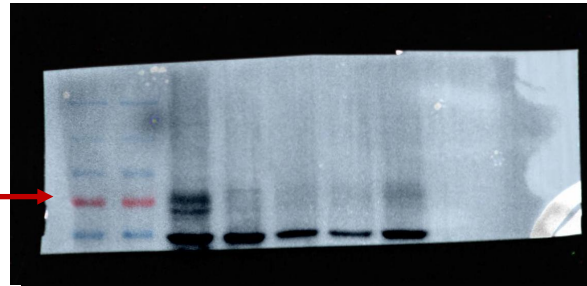

Cut here

GAPDH  
(35kDa)

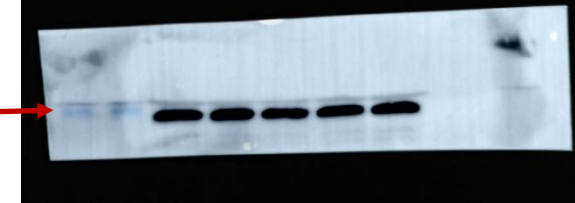

Cut here
